# Supplementary material for: Genomic arrays for the identification of high-risk chronic lymphocytic leukemia: ready for prime time?
Source: PubMed Central journal article supplement — Haematologica. 2021 Jan 1;106(1):7–9. doi: 10.3324/haematol.2020.264689 (PMC7776236; doi:10.3324/haematol.2020.264689), 2021-01-01
Supplement: 2020_264689-Disclosures_Contributions.pdf [file 2020_264689-Disclosures_Contributions.pdf]

Haematologica  
HAEMATOL/2020/264689  
Version 1

Genomic arrays for the identification of high risk chronic lymphocytic  
leukemia: ready for prime time?

Antonio Cuneo, Gian Matteo Rigolin, and Cristina Mecucci

Disclosures: none

Contributions: AC, GMR and CM wrote and approved the editorial
